# Supplementary material
Source: publisher site journal article supplement (https://www.dovepress.com/article/585916)
Supplement: Supplementary file 1 [file 585916%20Supplementary%20Material.docx]

# Supplementary information

## Supplementary methods

Demographics and participant characteristics prespecified for collection in the this study included: age, gender, ethnicity, race, highest level of education (degree completed), state of primary residence, timing of last eye exam with an eye care practitioner, number of years wearing contact lenses, type of soft contact lens, number of hours per day and days per week wearing contact lenses, number of hours each day wearing contact lenses while using a computer, smartphone, or tablet, current brand of contact lens worn, number of months wearing current brand of contact lens, current contact lens solution brand, likelihood of stopping contact lens wear in the upcoming 6 months (6-point scale), primary reason for considering stopping contact lens wear, frequency of playing computer or video games (by means of computer, phone, or any other method), and number of hours in an average weekday performing specified activities while wearing contact lenses (working in an office in front of a computer, working at home in front of a computer, watching TV, driving at night [including riding as a passenger], using a smartphone or tablet, studying or reading from print material [eg, book/magazine/newspaper], playing electronic games, engaging in sports/physical activity).

## Region definitions

East: Maine, New Hampshire, Rhode Island, Connecticut, Vermont, Massachusetts, New York, New Jersey, Pennsylvania, West Virginia, Delaware, Maryland, District of Columbia
Midwest: Ohio, Indiana, Illinois, Michigan, Minnesota, Wisconsin, Iowa, North Dakota, South Dakota, Kansas, Nebraska, Missouri
South: Kentucky, Tennessee, Virginia, North Carolina, South Carolina, Georgia, Florida, Alabama, Mississippi, Texas, Arkansas, Oklahoma, Louisiana
West: Arizona, New Mexico, Colorado, Nevada, Montana, Idaho, Wyoming, Utah, California, Washington, Oregon, Alaska, Hawaii

## Target enrollment

The target participant number for this in-home use test study initiative overall (screened and recruited) was approximately 1991 to yield an estimated 1294 after-use completed surveys, where this target number was based on an assumed overall completion rate of 65% (study and after-use survey rate completion) from those placed with the multi-purpose solution, and at least a 10% sub-group fallout from the general population for a total of 10 predefined subgroups of interest. In total, this in-home use test study initiative has recruited a total of 1619 participants, yielding a total sample size of 1180 responding participants (73% completion rate).

**Table S1: Inclusion and exclusion criteria**

| **Inclusion criteria** | **Exclusion criteria** |
| --- | --- |
| - US-based consumer - 18 years or older - Signed statement of informed consent - Eye exam within the last 2 years - Uses soft contact lenses for vision correction - Uses contact lens of a brand of interest and been using them for >1 month - Knowledge of disinfectant solution brand used - Wears contact lenses for ≥3 hours per day,  4 days per week - Digital device used for ≥3 hours per day | - Using any of the following lens types: - Soft contact lenses for overnight wear - Hard or rigid gas permeable contact lenses - Hybrid lenses that have a hard or rigid center and soft perimeter - Daily disposable contact lenses - A medical professional who may provide healthcare treatment or advice based on formal education/training - Has ever had an allergic reaction to any contact lens multi-purpose solution - Currently works for any of the following:a - Pharmaceutical, medical device, or biotech company - Marketing or healthcare consulting - Market research or advertising - Pharmacy - Healthcare company or facility |

**Notes:** aThis criterium also applies to any member of the participant’s immediate household. **Abbreviations:** US, United States.

**Table S2: Habitual contact lens wear type**

| **Self-reported type** | **Representative sample N=435 n (%)** |
| --- | --- |
| 1 week and then replaced with new pair | 31 (7.1%) |
| 2 weeks and then replaced with new pair | 105 (24.1%) |
| 1 month and then replaced with new pair | 199 (45.7%) |
| 2–3 months and then replaced with new pair | 66 (15.2%) |
| 6 months or more and then replaced with new pair | 34 (7.8%) |
